# Supplementary material for: Effect of laser Doppler flowmetry and occlusion time on outcome variability and mortality in rat middle cerebral artery occlusion: inconclusive results
Source: BMC Neurosci. 2018 Apr 19;19:24. doi: 10.1186/s12868-018-0425-0 (PMC5909274; doi:10.1186/s12868-018-0425-0)
Supplement: Supplementary file 1 — Additional file 1. Data on which “Effect of laser Doppler flowmetry and occlusion time on outcome variability and mortality in rat middle cerebral artery occlusion: inconclusive results” was based on. [file 12868_2018_425_MOESM1_ESM.xlsx]

## Sheet: Sheet1
Data on which "Effect of laser Doppler flowmetry and occlusion time on outcome variability and mortality in rat middle cerebral artery occlusion: inconclusive results" was based on
Consecutive number	Group (0=not doppler, 1=doppler, 2=60 min, 3=45 min)	Infarct size (%)	Weight MCAo	Weight d1	Doppler signal decrease	Saturation [%]	Heart rate [bpm]	Respiratory rate [brpm]	Died during MCAo [1=yes]	Died post-MCAo [1=yes]	Sticky-tape baseline 1 right	Sticky-tape baseline 1 left	Sticky-tape baseline 2 right	Sticky-tape baseline 2 left	Sticky-tape day1 1 right	Sticky-tape day1 1 left	Sticky-tape day1 2 right	Sticky-tape day1 2 left
1	1	0.567463	340	309	0.491238	97.3325	436.356	51.3241			24	30			0	30	0	30
2	0		339			98.5811	434.032	57.3309		1	24	30	23	28
3	0	0.362984	322	290		98.4139	451.274	66.0589			28	30			13	24	0	22
4	0	0.320558	324	294		98.6415	447.197	59.1541							0	23
5	1	0.114042	337	301	0.633725	96.9578	461.638	54.5853			10	2			0	2	1	10
6	0	0.267145	320	281		98.8585	448.175	48.9442			6	11			0	0	0	0
7	1	0.267116	303	269	0.56754	96.8517	333.326	56.078			11	1			0	0	0	5
8	0		306			96.6703	364.418	57.3924		1	26	0
9	1	0.648443	320	276	0.555234	98.3406	440.633	60.3536			13	17			0	0	0	9
10	0		320			93.9453	280.028	41.6576	1		4	2
11	0		313			98.2588	471.331	57.4167		1	17	0
12	1	0.554767	312	279	0.316354	95.5067	426.088	59.3641			8	24			0	8	0	10
13	1	0.347084	318	274	0.320546	94.3586	476.865	47.8881			21	28			0	9	0	17
14	1	0.279666	307	273	0.778489	98.2456	436.093	52.9105			29	26			0	0
15	0	0.364734	310	278		99.0052	406.428	51.9597			26	28			0	14	0	7
16	1	0.42515	Missing	273	0.614885	97.6556	431.264	46.3227			27	30			14	27	12	18
17	1	0.0327045	304	277	0.536095	96.1784	481.109	57.3058			30	30			7	30	5	30
18	0		304			98.5371	446.197	45.3294		1	23	16
19	0	0.362377	340	299		98.4156	492.163	51.8995			28	25			0	10	0	27
20	1		300		0.429104	94.4622	424.484	41.9336		1	8	0
21	0	0.0119181	310	278		98.1619	388.687	55.0072			28	5	11	0	13	6
22	0		293			99.0052	424.414	52.2912		1
23	1	0.323087	303	278	0.718779	93.6563	481.758	52.3091			30	30	30	25	10	24	19	25
24	1	0.357272	278	253	0.685866	98.5091	468.163	51.8797							0	15	1	17
25	0	0.468619	296	263		98.3984	424.86	45.718			9	21	2	2	0	11	0	8
26	0		281			97.9416	469.991	52.2531		1	23	11	6	15
27	1		314			96.4825	437.873	57.7936		1	12	0	0	0
28	0		275			98.3178	450.043	49.7613		1	30	30	30	30
29	0		277			96.964	448.235	49.3929		1	25	10	5	15
30	1	0.0446661	282	245	0.292217	98.0281	424.637	49.3481			25	15	23	30	14	10	1	0
31	1		262		0.632975	95.0682	368.417	44.1682		1	15	21	19	8
32	0	0.478569	287	260		96.8614	423.834	39.4264			23	25	27	18	4	15	0	5
33	0	0.429037	240	220		97.0745	416.497	44.433			15	23	20	7	0	0	0	0
34	1	0.643718	280	243	0.50356	85.7686	402.748	54.8604			25	12	2	2	0	0	0	1
35	1	0.634544	261	227	0.323969	93.3042	455.345	54.7563			30	20	30	20	0	0	0	0
36	1	0.0375573	280	259	0.343881	97.468	460.116	54.7759			29	14	26	26	11	12	6	1
37	1		281		0.782537	92.1061	408.927	48.6415		1	11	4	5	5
38	0		249						1		17	0	15	9
39	1		268		0.590189					1	19	16	21	22
40	0	0.272947	248	230							19	26	11	29	3	22	12	27
41	2	0.351185	328	309	0.614094	95.8829	429.16	59.6007			16	0	12	8	0	5	0	0
42	3	0.133609	315	305	0.494996	96.4416	495.238	62.9535			26	29	3	17	0	8	0	18
43	3		343		0.72915	94.3422	459.157	56.0181		1
44	2	0.210068	319	295	0.773719	98.5386	388.701	55.0052			22	20	0	2	5	19	0	22
45	2		296		0.708485				1		30	25	30	2
46	2	0.373278	310	276	0.565136	96.3888	433.347	59.6385			5	14	13	0	1	15	0	9
47	3	0.273429	316	286	0.589491	96.9166	428.608	53.6968			8	27	0	11	0	9	0	19
48	3		299		0.613844	93.5481	363.183	43.3813	1		2	27	16	30
49	2	0.374174	300	266	0.719778	96.7336	387.592	55.7718			11	23	4	7	0	3	0	2
50	2		295		0.674591	97.396	442.1	56.1015		1	30	30	30	30
51	2		298		0.66347	93.3249	460.822	53.6054		1	0	0	9	0
52	2	0.00420124	Missing	286	0.427429	97.1791	469.793	68.1416			8	30	4	12	12	24	14	25
53	3	0.462777	299	262	0.701254	98.1423	416.065	51.7459			5	8	21	1	0	0
54	2	0.582876	286	263	0.832638	92.9846	470.521	48.2233			9	22	11	6	1	15	0	23
55	3		296		0.853392	93.3031	455.82	42.3669	1		21	22	17	27
56	2	0.0916175	292	262	0.459972	98.5509	349.953	40.1274			14	17	25	3	0	0	0	8
57	2	0.486947	290	263	0.7	98.7302	394.381	55.1056			26	23	4	0	2	14	5	13
58	3		300		0.703625	96.5646	411.782	58.217		1	23	21	11	26
59	2	0.37098	310	272	0.636701	98.826	456.488	58.0461			30	30	28	7	12	11	11	12
60	2	0.0586164	283	262	0.646032	90.6039	472.542	57.3409			21	9	8	9	1	2	0	0
61	2	0.561338	286	256	0.68713	96.9933	451.411	62.2885			19	9	6	7	0	3	0	10
62	3		283		0.761104	95.7083	404.066	54.011	1		30	30	30	30
63	3	0.0473198	286	264	0.784409	98.4104	438.561	59.1011			5	11	13	1	5	9	6	3
64	3	0.0775049	305	277	0.672078	96.7138	449.716	54.6364			12	2	10	8	1	6	0	7
65	3	0.182682	295	266	0.637358	97.8517	463.07	65.0649			18	3	16	4	0	5	0	0
66	3	0.485961	286	255	0.716545	95.784	456.177	72.7953			0	8	4	1	0	0	0	0
67	3		272		0.77479	93.6662	473.889	57.3739		1	14	25	0	12
68	2	0.479535	289	267	0.714169	92.1027	417.658	58.4086			1	1	0	0	0	0	0	1
69	3		282		0.630926	97.7595	474.954	54.8443		1	11	8	11	0
70	3		274		0.686317	95.6839	467.325	51.7806		1	24	7	3	8
71	2		288		0.732657	97.7712	439.305	54.2513		1	7	7	1	5
72	3	0.452276	291	261	0.637306	98.3162	460.309	50.1977			17	12	20	18	0	1	0	12
73	2	0.14477	290	262	0.698864	96.9384	429.418	53.2178			21	14	23	0	0	0	0	0
74	3	0.351119	281	255	0.641169	97.6989	464.331	66.6896			15	0	0	2	0	0	0	0
75	3	0.319122	285	260	0.759206	98.17	446.483	58.4675			3	28	4	1	3	15	0	6
76	3	0.16323	280	263	0.681018	98.2259	437.047	62.0102			21	17	6	0	5	18	1	15
77	3	0.467562	282	248	0.898704	94.5488	456.452	57.988			25	10	14	0	0	0	0	0
78	2	0.402093	278	250	0.666987	91.3678	410.857	53.3992			20	17	2	0	0	2	0	1
79	2	0.157296	251	230	0.734321	94.9899	450.851	52.1956			8	26	2	14	1	20	0	5
80	2		305		0.683665	94.2815	417.799	51.3994		1	30	2	9	7
